# Supplementary material for: In situ intercalation and exploitation of Co3O4 nanoparticles grown on carbon nitride nanosheets for highly efficient degradation of methylene blue
Source: Royal Society of Chemistry journal article supplement (doi:10.1039/d0dt02982c), 2020-01-01
Supplement: d0dt02982c1.pdf [file d0dt02982c1.pdf]

## Supporting Information

### In-situ intercalation and exploitation of Co<sub>3</sub>O<sub>4</sub> nanoparticles grown on carbon nitride nanosheets for highly efficient degradation of methylene blue

Yan Li,<sup>a</sup> Lei Wang,<sup>a\*</sup> Yuting Xiao,<sup>b</sup> Guohui Tian,<sup>a</sup> Chungui Tian,<sup>a</sup> Honggang Fu<sup>a\*</sup>

<sup>a</sup> Key Laboratory of Functional Inorganic Material Chemistry, Ministry of Education of the People's Republic of China, Heilongjiang University, Harbin 150080, China.

E-mail: wanglei0525@hlju.edu.cn, fuhg@vip.sina.com, fuhg@hlju.edu.cn

<sup>b</sup> Key Laboratory of Jiangxi Province for Persistent Pollutants Control and Resources Recycle, Nanchang Hangkong University, Nanchang, Jiangxi 330063, China. E-mail: yutingxiao9@sina.com

**Table S1.** The denoted name and synthesized samples for various samples.

| Samples                                                           | concentration of Co(NO <sub>3</sub> ) <sub>2</sub> |
|-------------------------------------------------------------------|----------------------------------------------------|
| 1-Co <sub>3</sub> O <sub>4</sub> /S-C <sub>3</sub> N <sub>4</sub> | 6 mM                                               |
| Co <sub>3</sub> O <sub>4</sub> /S-C <sub>3</sub> N <sub>4</sub>   | 23mM                                               |
| 4-Co <sub>3</sub> O <sub>4</sub> /S-C <sub>3</sub> N <sub>4</sub> | 46 mM                                              |

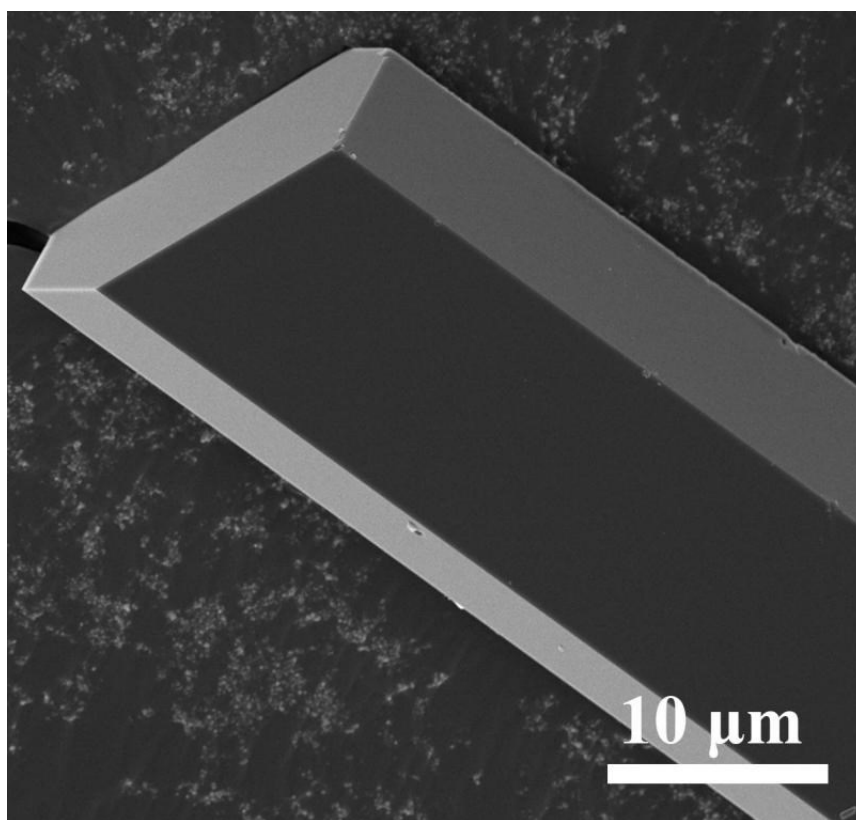

**Fig. S1** SEM image of C<sub>3</sub>N<sub>4</sub> precursor.

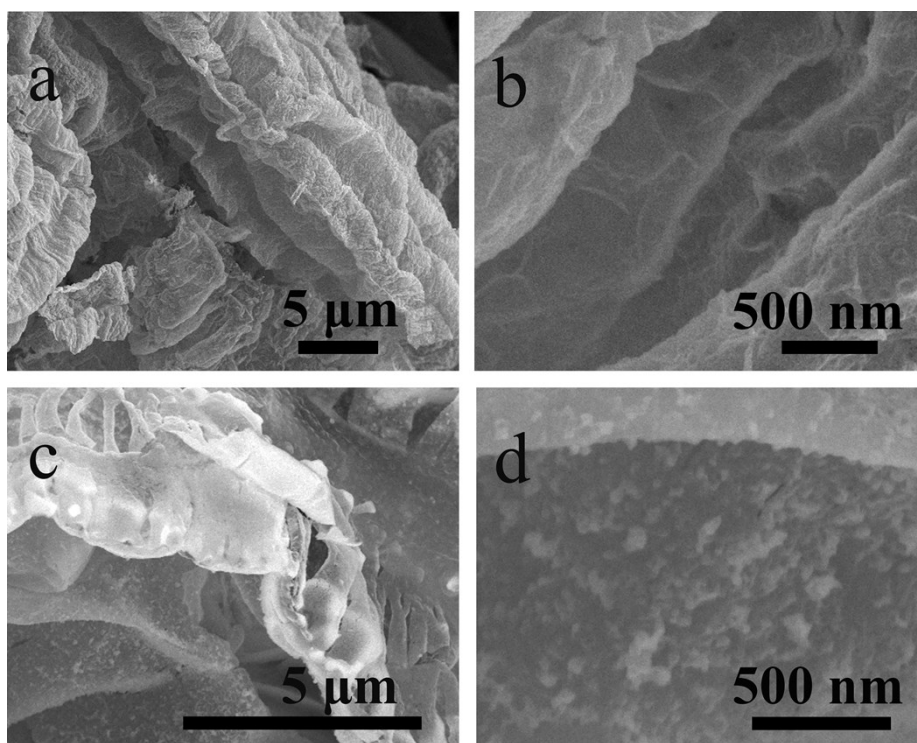

**Fig. S2** SEM images of (a, b) 1- $\text{Co}_3\text{O}_4/\text{S-C}_3\text{N}_4$ , (c, d) 4- $\text{Co}_3\text{O}_4/\text{S-C}_3\text{N}_4$ .

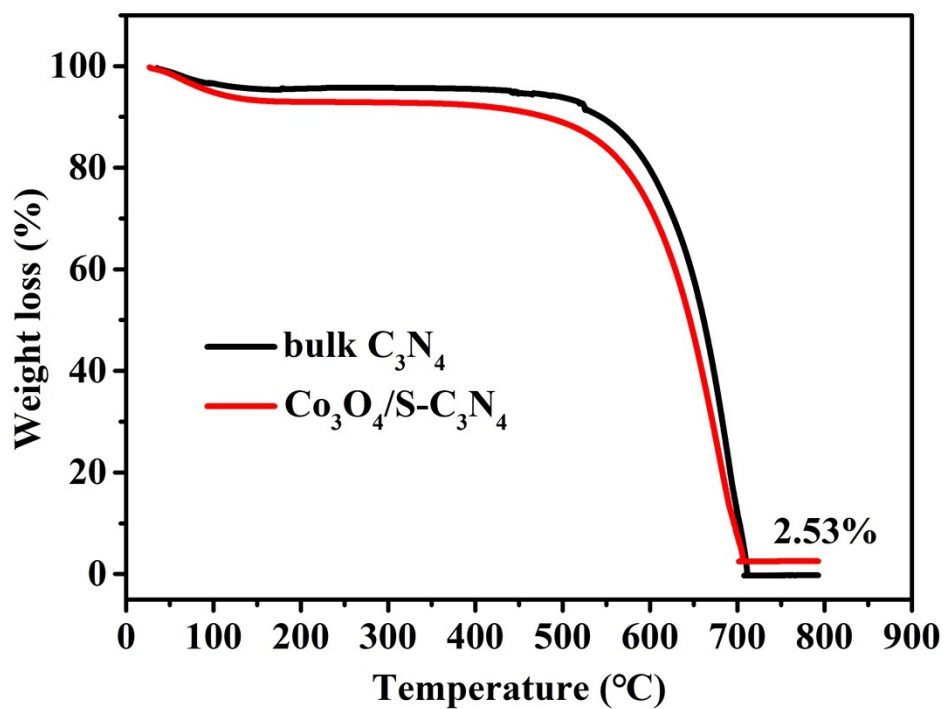

**Fig. S3** TG curves of bulk C<sub>3</sub>N<sub>4</sub> and Co<sub>3</sub>O<sub>4</sub>/S-C<sub>3</sub>N<sub>4</sub> samples tested in air ambient with a heating rate of 10 °C min<sup>-1</sup>.

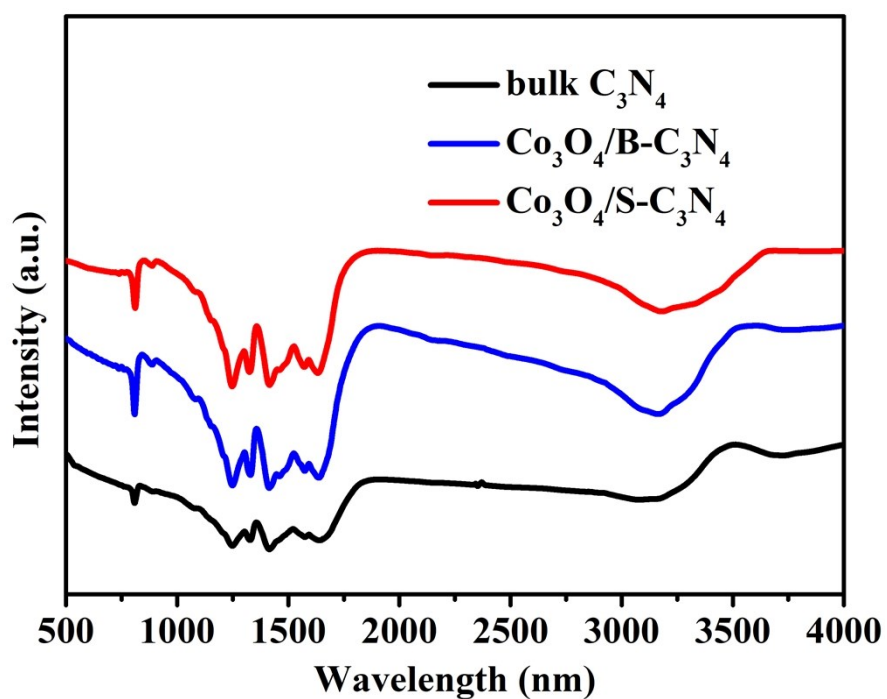

**Fig. S4** FT-IR spectra of various samples.

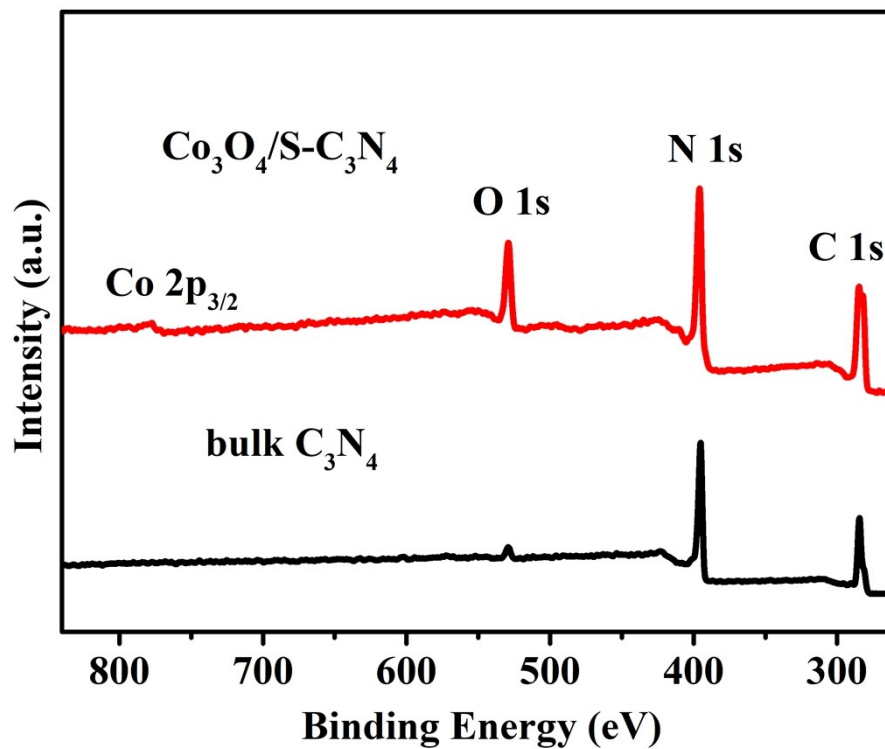

Fig. S5 Wide XPS spectrum of the bulk  $C_3N_4$  and  $Co_3O_4/S-C_3N_4$  samples.

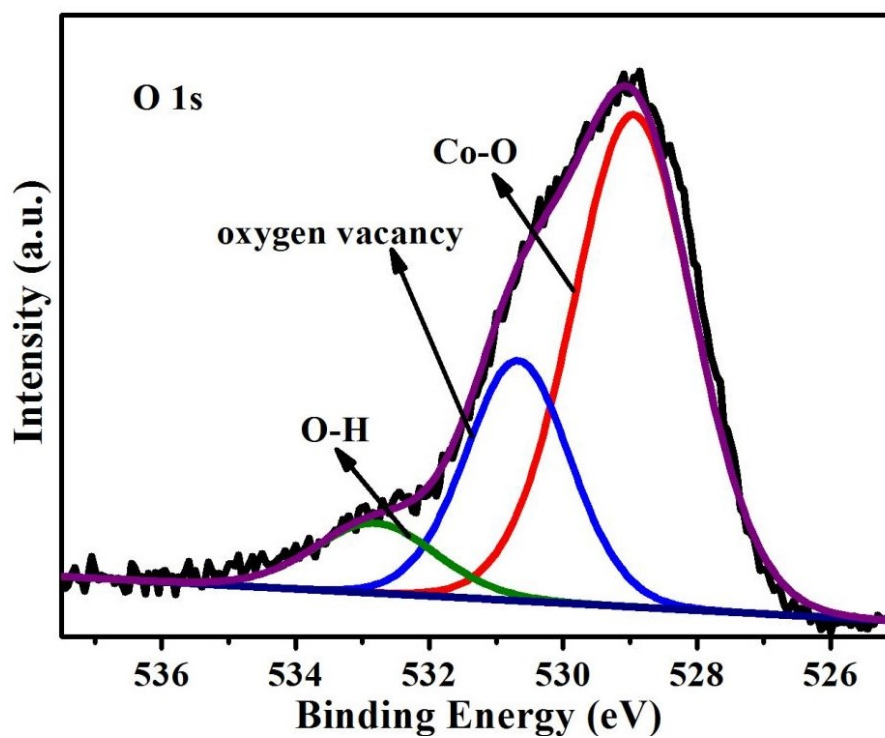

Fig. S6 XPS spectra of O 1s for  $Co_3O_4/S-C_3N_4$  sample.

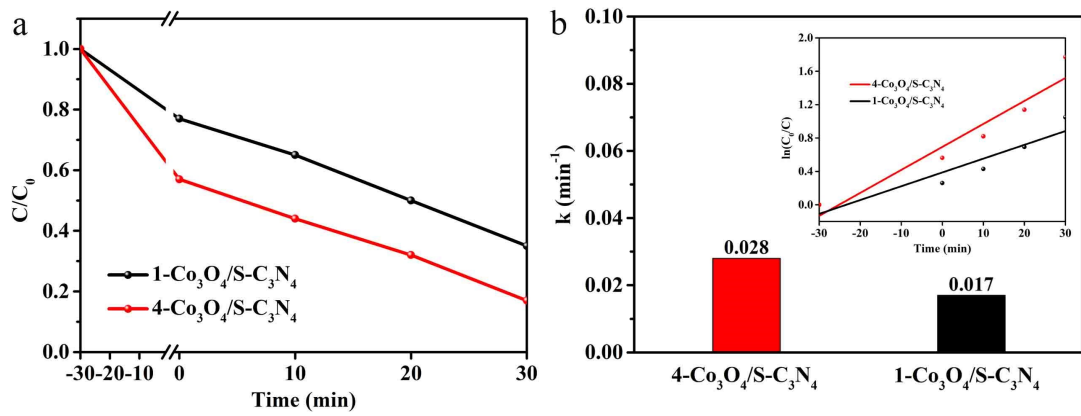

**Fig. S7** Methylene blue degradation efficiency diagram of sample  $1-\text{Co}_3\text{O}_4/\text{S}-\text{C}_3\text{N}_4$  and  $4-\text{Co}_3\text{O}_4/\text{S}-\text{C}_3\text{N}_4$

**Table S2.** Comparison the photocatalytic degradation rate of  $\text{Co}_3\text{O}_4/\text{S-C}_3\text{N}_4$  with the reported  $\text{C}_3\text{N}_4$ -based heterojunctions.

| Catalyst                                                         | Catalyst usage (mg) | Methylene blue concentration ( $\text{mg L}^{-1}$ ) | Reaction time (min) | Degradation rate (%) | References       |
|------------------------------------------------------------------|---------------------|-----------------------------------------------------|---------------------|----------------------|------------------|
| $\alpha\text{-ZnTcPc/g-C}_3\text{N}_4$                           | 50                  | 10                                                  | 50                  | 94.49                | S1               |
| N-ZnO/g- $\text{C}_3\text{N}_4$                                  | 100                 | 20                                                  | 90                  | 95                   | S2               |
| g- $\text{C}_3\text{N}_4$                                        | 30                  | 10                                                  | 40                  | 99                   | S3               |
| $\text{C}_3\text{N}_4/\text{Ag}_3\text{PO}_4/\text{NCDs}$        |                     |                                                     |                     |                      |                  |
| g- $\text{C}_3\text{N}_4/\text{TiO}_2/\text{Ag}$                 | 6                   | 7.5                                                 | 60                  | 100                  | S4               |
| $\text{WO}_3/\text{g-C}_3\text{N}_4$                             | 50                  | 50                                                  | 90                  | 95                   | S5               |
| $\text{TiO}_2/\text{Na-g-C}_3\text{N}_4$                         | 100                 | 20                                                  | 120                 | 100                  | S6               |
| $\text{Ag}_2\text{O/g-C}_3\text{N}_4$                            | 100                 | 10                                                  | 30                  | 100                  | S7               |
| $\text{TiO}_{2-x}/\text{Ag/g-C}_3\text{N}_4$                     | 25                  | 10                                                  | 180                 | 99                   | S8               |
| g- $\text{C}_3\text{N}_4\text{-RGO-TiO}_2$                       | 50                  | 30                                                  | 180                 | 92                   | S9               |
| g- $\text{C}_3\text{N}_4/\text{Ag}_2\text{CrO}_4$                | 10                  | 10                                                  | 120                 | 99.1                 | S10              |
| Ag- $\text{Fe}_3\text{O}_4/\text{g-C}_3\text{N}_4$               | 25                  | 10                                                  | 120                 | 99                   | S11              |
| $\text{Zn}_{0.25}\text{Cd}_{0.75}\text{S/g-C}_3\text{N}_4$       | 10                  | 10                                                  | 120                 | 92.25                | S12              |
| g- $\text{C}_3\text{N}_4/\text{Fe@ZnO}$                          | 100                 | 10                                                  | 90                  | 95                   | S13              |
| g- $\text{C}_3\text{N}_4/\text{MoS}_2/\text{Bi}_2\text{O}_3$     | 50                  | 20                                                  | 90                  | 98.5                 | S14              |
| $\text{CoFe}_2\text{O}_4/\text{g-C}_3\text{N}_4$                 | 20                  | 10                                                  | 180                 | 97.3                 | S15              |
| $\text{ZnFe}_2\text{O}_4/\text{g-C}_3\text{N}_4$                 | 30                  | 10                                                  | 120                 | 98                   | S16              |
| Ca $\text{Fe}_2\text{O}_4$ 30%/g- $\text{C}_3\text{N}_4$         | 100                 | 10                                                  | 120                 | 90                   | S17              |
| PANI/ $\text{C}_3\text{N}_4$                                     | 25                  | 11                                                  | 120                 | ~ 80                 | S18              |
| <b><math>\text{Co}_3\text{O}_4/\text{S-C}_3\text{N}_4</math></b> | <b>10</b>           | <b>10</b>                                           | <b>30</b>           | <b>99.5</b>          | <b>This work</b> |

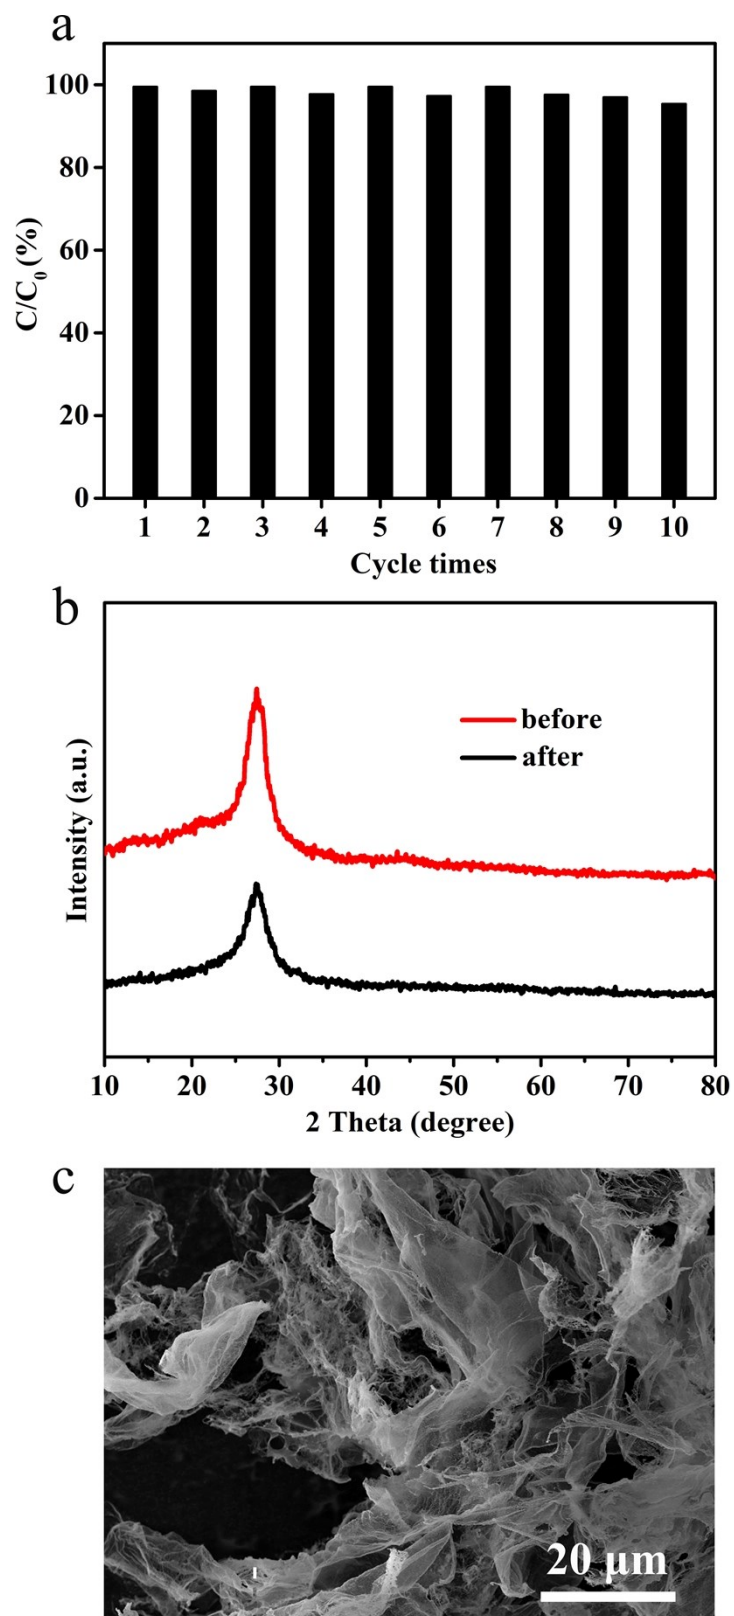

**Fig. S8** Degradation ratios for 10 photocatalytic cyclic tests of  $\text{Co}_3\text{O}_4/\text{S-C}_3\text{N}_4$  sample.



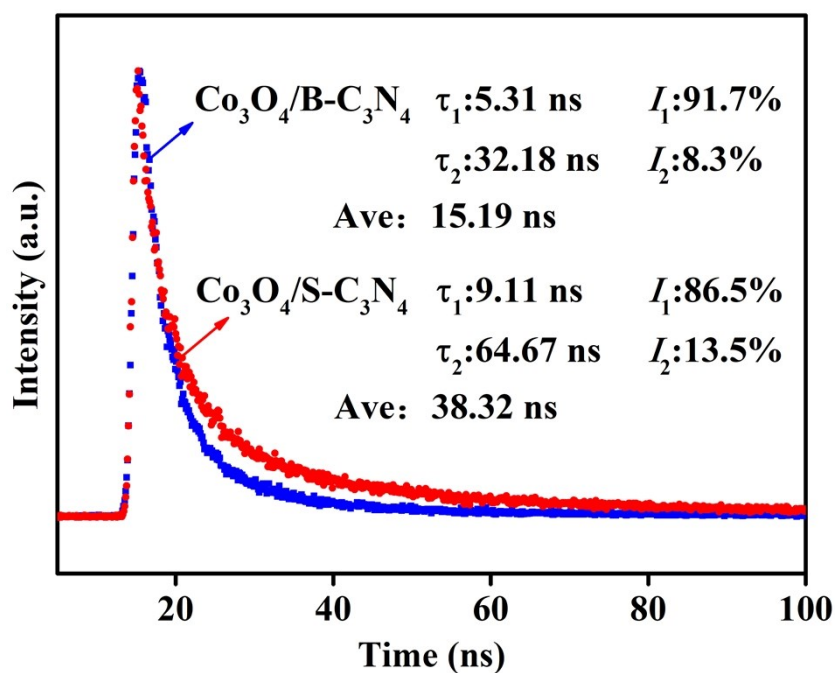

Fig. S9 Time-resolved PL decay spectra of  $\text{Co}_3\text{O}_4/\text{B-C}_3\text{N}_4$  and  $\text{Co}_3\text{O}_4/\text{S-C}_3\text{N}_4$  samples.

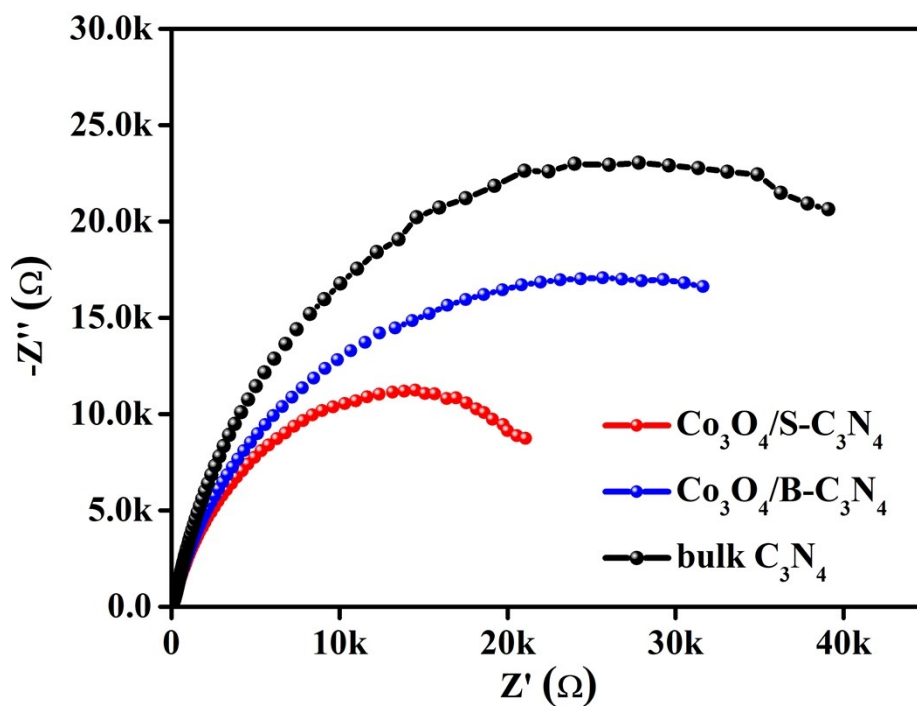

Fig. S10 EIS Nyquist plots of bulk  $\text{C}_3\text{N}_4$ ,  $\text{Co}_3\text{O}_4/\text{B-C}_3\text{N}_4$  and  $\text{Co}_3\text{O}_4/\text{S-C}_3\text{N}_4$  electrodes with visible light irradiation.

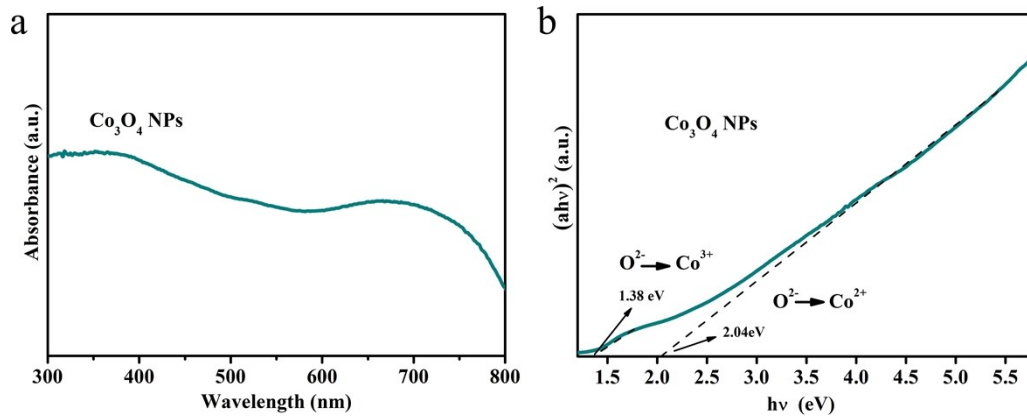

**Fig. S11** (a) UV-vis absorption spectra of  $\text{Co}_3\text{O}_4$  NPs, (b) Optical bandgap diagrams of  $\text{Co}_3\text{O}_4$  NPs.

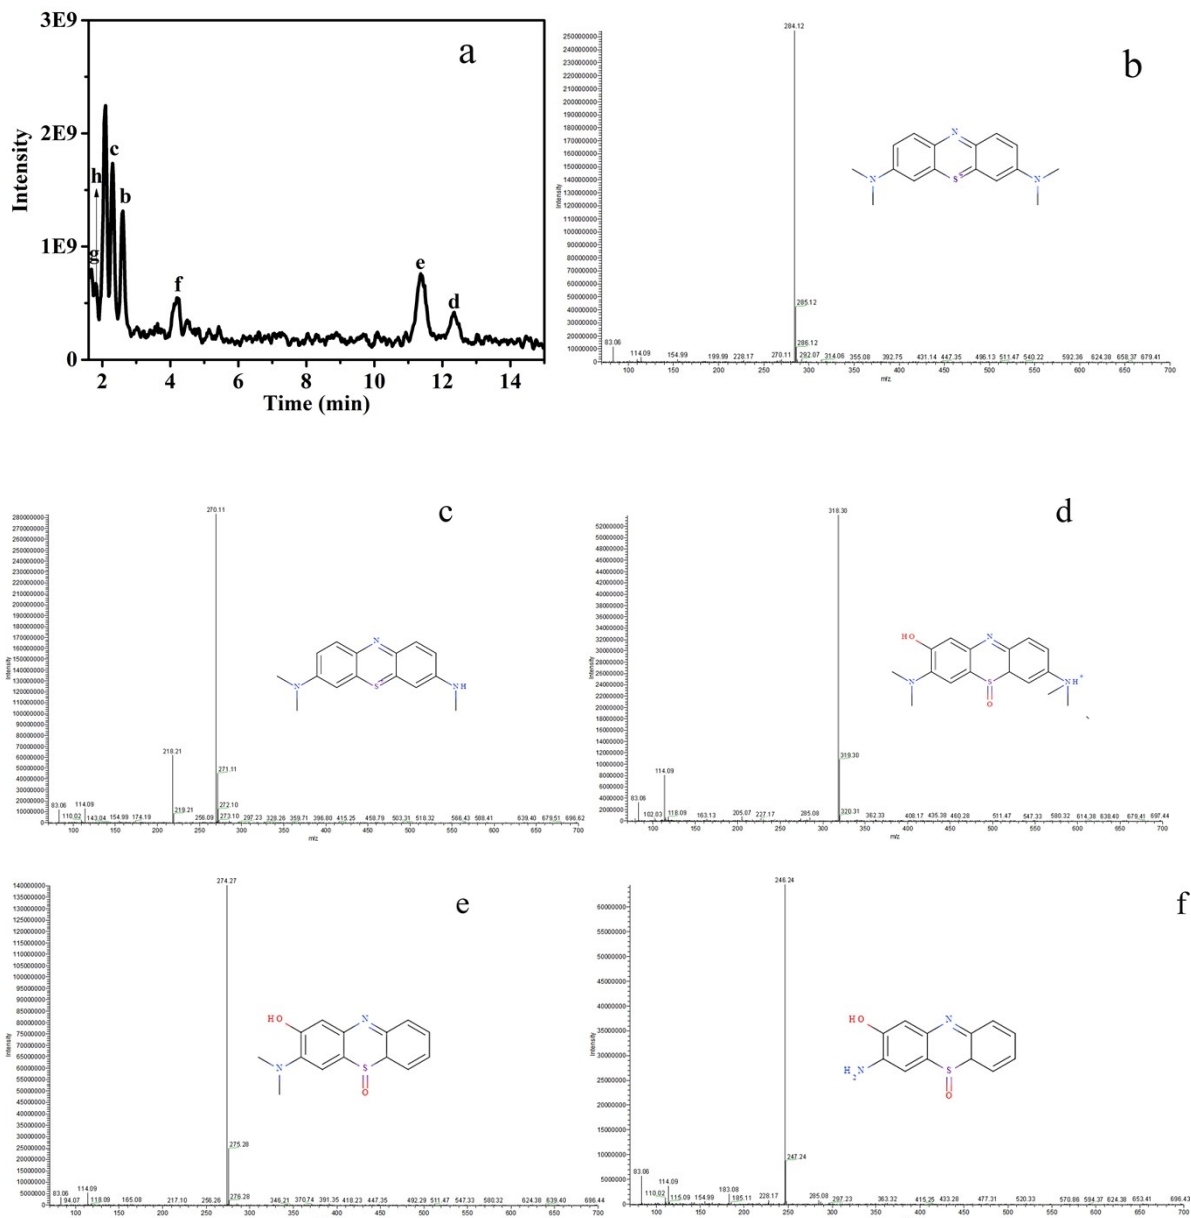

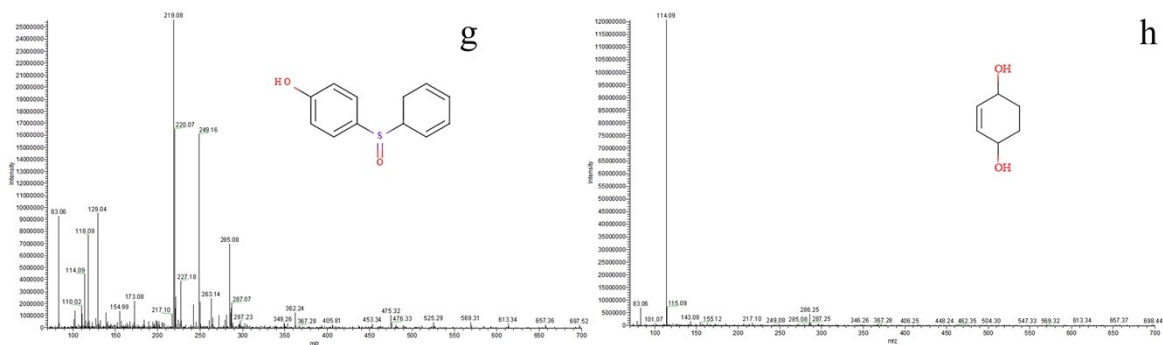

**Fig. S12** (a) Total ion flow diagram, (b-h) the mass spectrum of the sample  $\text{Co}_3\text{O}_4/\text{S-C}_3\text{N}_4$  obtained by the LC-MS during the photocatalytic degradation of methylene blue after 20 min photodegradation.

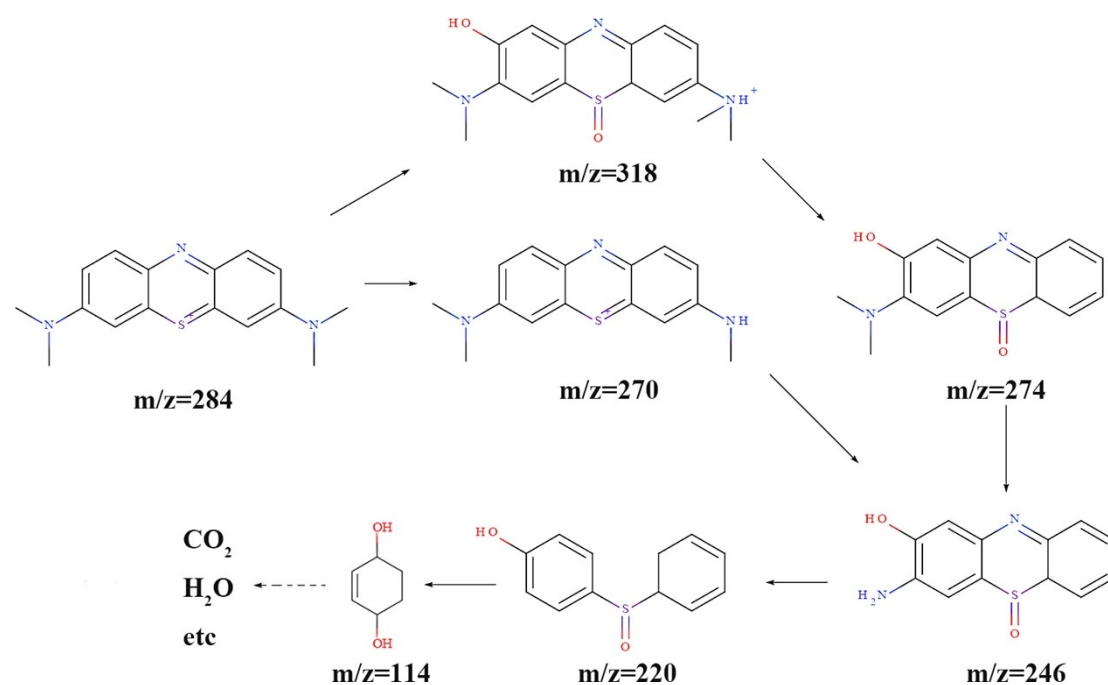

**Fig. S13** Propose a way to degrade MB by  $\text{Co}_3\text{O}_4/\text{S-C}_3\text{N}_4$  photocatalysis

The molecular ion peak at  $m/z=284$  is attributed to MB (**Fig. S12b**). The first step decomposition of MB molecules should be done followed the two means: On the one hand, it could be directly broken the  $-\text{N-CH}_3$  bond to produce an intermediate with a  $m/z=270$  (**Fig. S12c**). On the other hand, the S atoms of the  $\text{C-S}^+=\text{C}$  group in MB molecules could be oxidized by  $\cdot\text{OH}$  radicals,<sup>19,20</sup> at the same time, the active species  $\cdot\text{OH}$  and  $\cdot\text{O}_2^-$  attack the benzene ring in the methylene blue ion, resulting in

the intermediate with  $m/z=318$  was formed (**Fig. S12d**). The low bond energy of N-CH<sub>3</sub> is easy to be attacked by the active molecule •OH and form an intermediate with  $m/z=274$  (**Fig. S12e**). Under the attack of •OH, an intermediate with  $m/z=114$  is formed after the substitution reaction ( $m/z=246$ ) and addition reaction ( $m/z=220$ ). After a series of oxidation processes, methylene blue was degraded to form CO<sub>2</sub>, H<sub>2</sub>O and other small molecules.

## References:

- [S1] Y. He, Z. Huang, Z. Ma, B. Yao, H. Liu, L. Hu, Q. Zhao, Q. Yang, D. Liu and D. Du, *Appl. Surf. Sci.*, 2019, **498**, 143834.
- [S2] Y. Liu, H. Liu, H. Zhou, T. Li and L. Zhang, *Appl. Surf. Sci.*, 2019, **466**, 133-140.
- [S3] X. Miao, X. Yue, Z. Ji, X. Shen, H. Zhou, M. Liu, K. Xu, J. Zhu, G. Zhu, L. Kong and S. A. Shan, *Appl. Catal., B*, 2018, **227**, 459-469.
- [S4] D. Yan, X. Wu, J. Pei, C. Wu, X. Wang and H. Zhao, *Ceram. Int.*, 2020, **46**, 696-702.
- [S5] X. Liu, A. Jin, Y. Jia, T. Xia, C. Deng, M. Zhu, C. Chen and X. Chen, *Appl. Surf. Sci.*, 2017, **405**, 359-371.
- [S6] H. Liu, D. Yu, T. Sun, H. Du, W. Jiang, Y. Muhammad and L. Huang, *Appl. Surf. Sci.*, 2019, **473**, 855-863.
- [S7] S. L. D. Zhang, X. Pu, X. Y, R. Han, J. Yin and X. Ren, *Sep. Purif. Technol.*, 2019, **210**, 786-797.
- [S8] Y. Cao, Z. Xing, Z. Li, X. Wu, M. Hu, X. Yan, Q. Zhu, S. Yang and W. Zhou, *J. Hazard. Mater.*, 2018, **343**, 181-190.
- [S9] F. Wu, X. Li, W. Liu and S. Zhang, *Appl. Surf. Sci.*, 2017, **405**, 60-70.
- [S10] Y. Shang, X. Chen, W. Liu, P. Tan, H. Chen, L. Wu, C. Ma, X. Xiong and J. Pan, *Appl. Catal., B*, 2017, **204**, 78-88.
- [S11] B. Pant, M. Park, J. H. Lee, H.-Y. Kim and S.-J. Park, *J. Colloid Interface Sci.*, 2017, **496**, 343-352.
- [S12] X. Li, L. Dong, L. Shan, X. Jin and Y. Guo, *Canadian Journal of Chemistry*, 2020, **98**, 441-444.
- [S13] M. A. Qamer, S. Shahid and M. Javed, *Ceram. Int.*, 2020, **46**, 22171-22180.
- [S14] V. Shanmugam, K. S. Jeyaperumal, P. Mariappan and A. L. Muppudathi, *New Journal of Chemistry*, 2020, **40**, 13182-13194.
- [S15] S. Huang, Y. Xu, M. Xie, H. Xu, M. He, J. Xia, L. Huang and H. Li, *Colloids Surf., A*, 2015, **478**, 71-80.
- [S16] Y. Wu, Y. Wang, A. Di, X. Yang and G. Chen, *Catal. Lett.*, 2018, **148**, 2179-2189.

- [S17] S. Vadivel, D. Maruthamani, A. Habibi-Yangjeh, B. Paul, S. S. Dhar and K. Selvam, *J. Colloid Interface Sci.*, 2016, **480**, 126-136.
- [S18] W. Jiang, W. Luo, R. Zong, W. Yao, Z. Li and Y. Zhu, *Small*, 2016, **12**, 4370-4378.
- [S19] C. H. Nguyen, C. C. Fu and R. S. Juang, *J. Clean. Prod.*, 2018, **202**, 413-427.
- [S20] M. Moztahida and D. S. Lee, *J. Hazard. Mater.*, 2020, **400**, 123314.
